# Supplementary material
Source: PubMed Central journal article supplement (PMC4931731)
Supplement: Supp_Table1.pdf [file Supp_Table1.pdf]

## Supplementary Data

SUPPLEMENTARY TABLE S1. ECHOCARDIOGRAPHIC CHARACTERISTICS OF HIV-EXPOSED UNINFECTED CHILDREN BORN TO HIV-INFECTED MOTHERS AND EXPOSED OR UNEXPOSED TO ANTIRETROVIRAL THERAPY, BY TYPE OF THERAPY

| <i>Echocardiographic Z-score</i>       | <i>HAART exposure in utero</i>                        |                                                        |                                             |                                      |
|----------------------------------------|-------------------------------------------------------|--------------------------------------------------------|---------------------------------------------|--------------------------------------|
|                                        | <i>Not exposed to any ARVs (n=18)</i><br>n, mean (SD) | <i>Exposed to non-HAART ARV (n=89)</i><br>n, mean (SD) | <i>HAART exposed (n=67)</i><br>n, mean (SD) | <i>Total (n=174)</i><br>n, mean (SD) |
| <b>Functional systolic parameters</b>  |                                                       |                                                        |                                             |                                      |
| Contractility                          | 14, -0.21 (0.45)                                      | 79, 0.30 (1.08)                                        | 59, 0.38 (0.94)                             | 152, 0.28 (0.99)                     |
| Ejection fraction                      | 18, 0.19 (0.86)                                       | 87, 0.15 (0.86)                                        | 66, 0.20 (0.92)                             | 171, 0.17 (0.88)                     |
| Fractional shortening                  | 18, 0.23 (1.00)                                       | 89, 0.34 (0.94)                                        | 67, 0.43 (0.95)                             | 174, 0.36 (0.95)                     |
| <b>Functional diastolic parameters</b> |                                                       |                                                        |                                             |                                      |
| Peak early velocity                    | 18, 0.05 (0.80)                                       | 89, 0.34 (1.07)                                        | 66, 0.39 (0.83)                             | 173, 0.33 (0.96)                     |
| Peak atrial velocity                   | 18, -0.24 (1.29)                                      | 84, 0.46 (1.44)                                        | 66, 0.08 (1.20)                             | 168, 0.24 (1.35)                     |
| Peak early/atrial velocity (E/A ratio) | 18, 0.22 (1.19)                                       | 84, -0.13 (0.91)                                       | 66, 0.20 (1.04)                             | 168, 0.04 (1.00)                     |
| Peak early tissue (E')                 | 18, 0.61 (1.79)                                       | 86, 0.45 (1.60)                                        | 64, 0.38 (1.60)                             | 168, 0.44 (1.61)                     |
| Peak early inflow/early tissue (E/E')  | 18, -0.45 (1.19)                                      | 86, 0.04 (1.59)                                        | 64, 0.11 (1.27)                             | 168, 0.01 (1.44)                     |
| Peak early deceleration time           | 18, -0.42 (0.95)                                      | 84, -0.40 (0.95)                                       | 66, -0.26 (1.07)                            | 168, -0.34 (1.00)                    |
| <b>Structural parameters</b>           |                                                       |                                                        |                                             |                                      |
| LV mass                                | 18, 0.02 (0.48)                                       | 86, 0.03 (0.92)                                        | 66, 0.15 (0.78)                             | 170, 0.08 (0.83)                     |
| ED LV volume                           | 18, 0.09 (0.64)                                       | 86, -0.17 (1.04)                                       | 66, -0.18 (0.95)                            | 170, -0.15 (0.97)                    |
| ES LV volume                           | 18, 0.02 (0.75)                                       | 86, -0.33 (1.00)                                       | 66, -0.10 (1.02)                            | 170, -0.20 (0.99)                    |
| Mass-to-volume ratio                   | 18, -0.15 (0.75)                                      | 87, 0.25 (0.97)                                        | 66, 0.28 (0.92)                             | 171, 0.22 (0.93)                     |

ARV, antiretroviral; ED, end-diastolic; ES, end-systolic; HAART, highly active antiretroviral treatment; LV, left ventricular; SD, standard deviation.
