# Supplementary material
Source: PubMed Central journal article supplement (PMC4931731)
Supplement: Supp_Table2.pdf [file Supp_Table2.pdf]

SUPPLEMENTARY TABLE S2. ECHOCARDIOGRAPHIC CHARACTERISTICS OF HIV-EXPOSED UNINFECTED CHILDREN BORN TO HIV-INFECTED MOTHERS AND EXPOSED *IN UTERO* TO ZIDOVUDINE MONOTHERAPY OR COMBINATION ANTIRETROVIRAL THERAPY

| <i>Echocardiographic Z-score</i>       | <i>Unadjusted Z-score mean (SE)</i> |                                                   |          | <i>Adjusted<sup>a</sup> Z-score mean (SE)</i> |                                                   |          |
|----------------------------------------|-------------------------------------|---------------------------------------------------|----------|-----------------------------------------------|---------------------------------------------------|----------|
|                                        | <i>Monotherapy<br/>(n=58)</i>       | <i>Exposed to<br/>combination<br/>ARVs (n=98)</i> | <i>P</i> | <i>Monotherapy<br/>(n=58)</i>                 | <i>Exposed to<br/>combination<br/>ARVs (n=98)</i> | <i>P</i> |
| <b>Functional systolic parameters</b>  |                                     |                                                   |          |                                               |                                                   |          |
| Contractility                          | 0.31 (0.14)                         | 0.35 (0.11)                                       | .83      | 0.32 (0.20)                                   | 0.34 (0.14)                                       | .95      |
| Fractional shortening                  | 0.42 (0.12)                         | 0.36 (0.10)                                       | .70      | 0.50 (0.18)                                   | 0.31 (0.12)                                       | .45      |
| Ejection fraction                      | 0.16 (0.12)                         | 0.18 (0.09)                                       | .88      | 0.34 (0.17)                                   | 0.08 (0.12)                                       | .29      |
| <b>Functional diastolic parameters</b> |                                     |                                                   |          |                                               |                                                   |          |
| Peak early velocity                    | 0.27 (0.13)                         | 0.42 (0.10)                                       | .34      | 0.33 (0.18)                                   | 0.38 (0.12)                                       | .83      |
| Peak atrial velocity                   | 0.29 (0.18)                         | 0.30 (0.14)                                       | .97      | 0.41 (0.25)                                   | 0.23 (0.17)                                       | .63      |
| Peak early/atrial velocity (E/A ratio) | -0.07 (0.13)                        | 0.07 (0.10)                                       | .39      | -0.15 (0.19)                                  | 0.11 (0.13)                                       | .34      |
| Peak early tissue (E')                 | 0.48 (0.22)                         | 0.39 (0.16)                                       | .74      | 0.80 (0.30)                                   | 0.19 (0.20)                                       | .15      |
| Peak early inflow/early tissue (E/E')  | -0.12 (0.20)                        | 0.18 (0.15)                                       | .22      | -0.36 (0.27)                                  | 0.32 (0.18)                                       | .087     |
| Peak early deceleration time           | -0.17 (0.14)                        | -0.43 (0.10)                                      | .14      | 0.10 (0.20)                                   | -0.59 (0.13)                                      | .016     |
| <b>Structural parameters</b>           |                                     |                                                   |          |                                               |                                                   |          |
| LV mass                                | 0.03 (0.12)                         | 0.11 (0.09)                                       | .55      | -0.11 (0.16)                                  | 0.20 (0.11)                                       | .19      |
| ED LV volume                           | -0.16 (0.13)                        | -0.19 (0.10)                                      | .86      | -0.05 (0.18)                                  | -0.24 (0.12)                                      | .45      |
| ES LV volume                           | -0.45 (0.14)                        | -0.11 (0.10)                                      | .047     | -0.29 (0.16)                                  | -0.19 (0.11)                                      | .67      |
| Mass-to-volume ratio                   | 0.31 (0.13)                         | 0.24 (0.10)                                       | .68      | -0.08 (0.16)                                  | 0.46 (0.11)                                       | .024     |

Results of linear regression modeling, excluding those unexposed to any ARVs during pregnancy ( $n=18$ ). Each row represents a separate linear regression model comparing youth exposed to zidovudine monotherapy with those exposed to two or more ARVs.

<sup>a</sup>Adjusted for age, sex, race/ethnicity, BMI Z-score, and SBP Z-score; diastolic function measures also adjusted for heart rate. ARVs, antiretrovirals; D, diastolic; S, systolic; BMI, body-mass index; SBP, systolic blood pressure.
